# Supplementary material for: Confirmed Mechanism for 1,8-Diaminonaphthalene and Ethyl Aroylpyrovate Derivatives Reaction, DFT/B3LYP, and Antimicrobial Activity of the Products
Source: Hindawi journal article supplement (doi:10.1155/2018/4086824), 2018-12-10
Supplement: f1 [file 4086824.f1.docx]

| 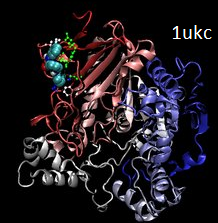 | 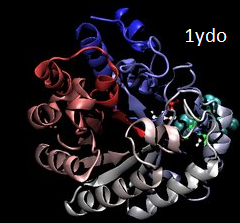 | 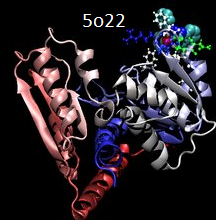 |
| --- | --- | --- |
| 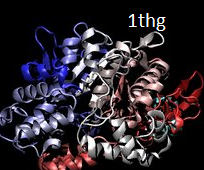 | 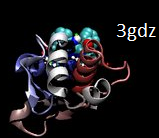 | 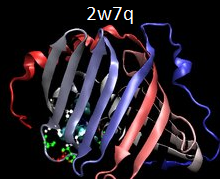 |
| 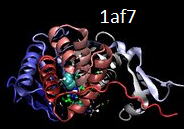 | 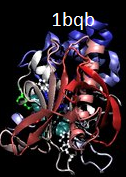 | 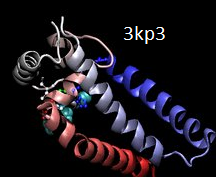 |
| 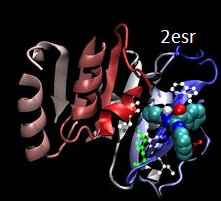 | | |
| **Fig. 1S.** Docking complexes for compound 21A with variable protein receptors | | |

| 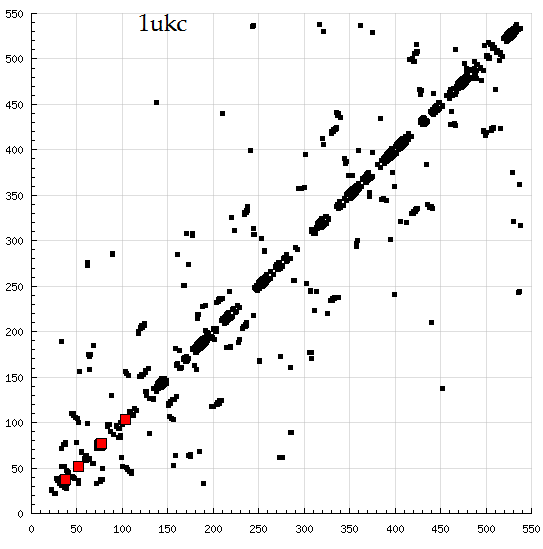 | 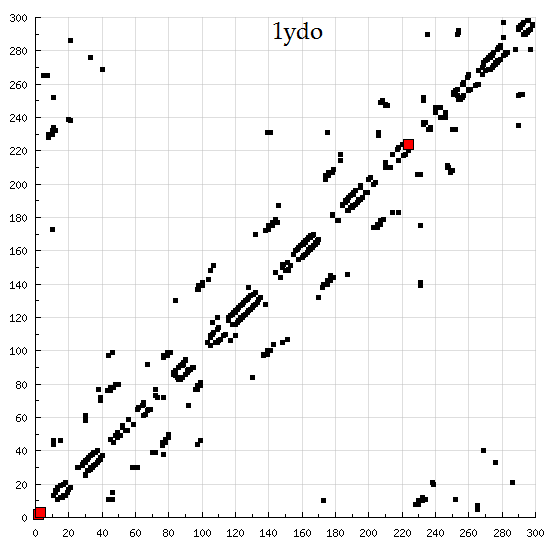 | 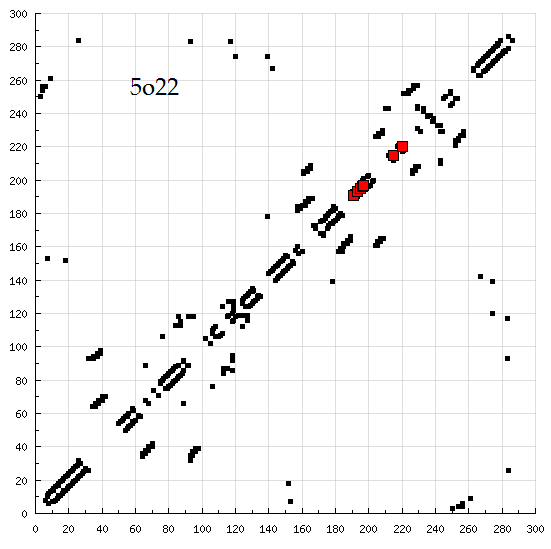 |
| --- | --- | --- |
| 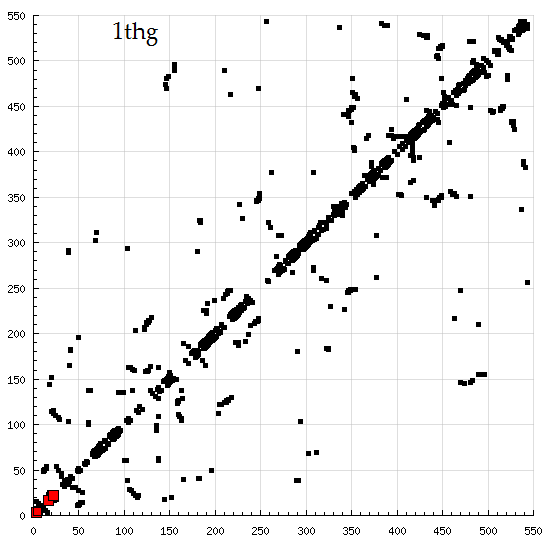 | 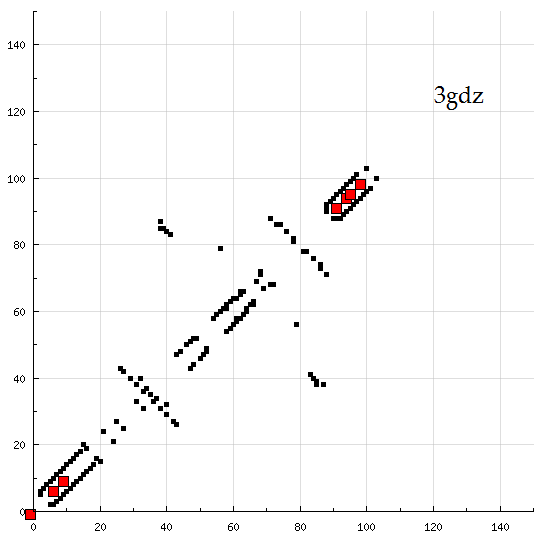 | 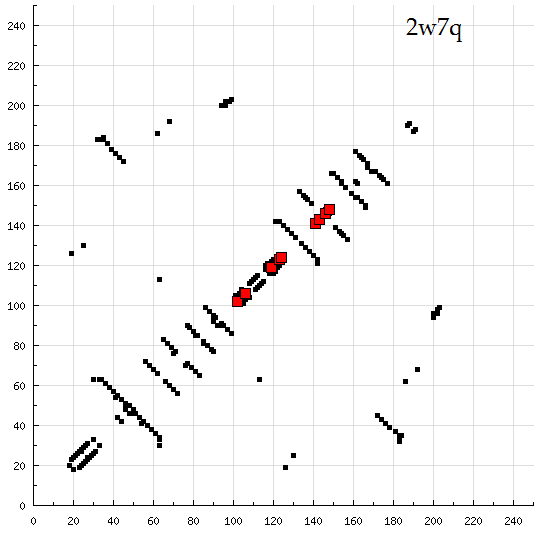 |
| 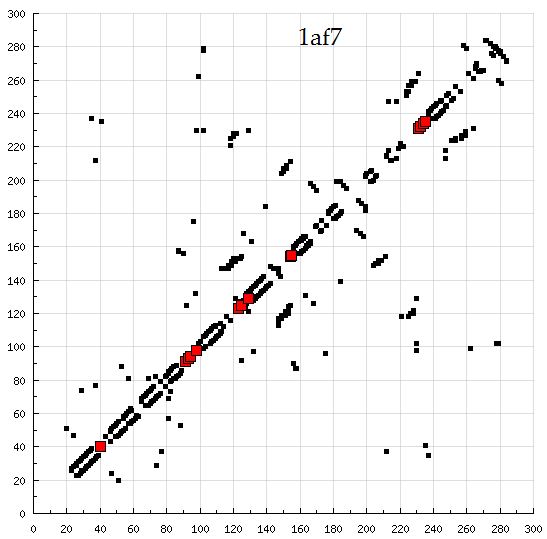 | 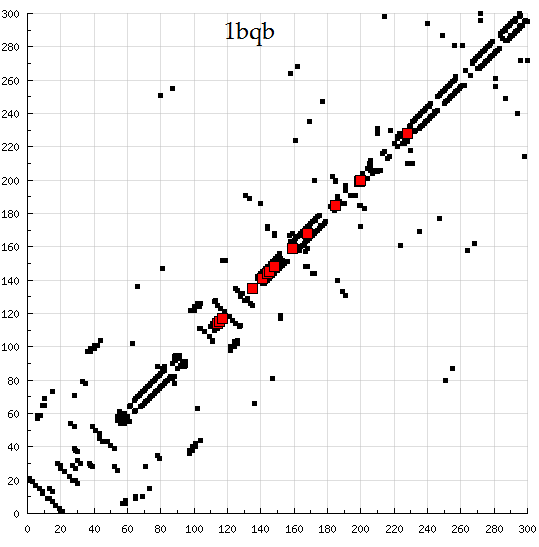 | 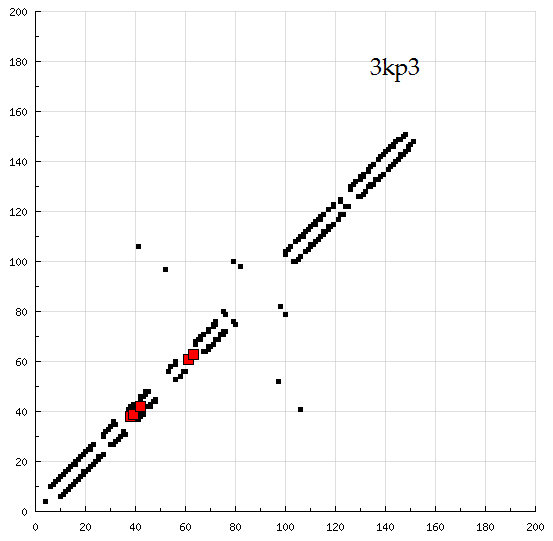 |
| 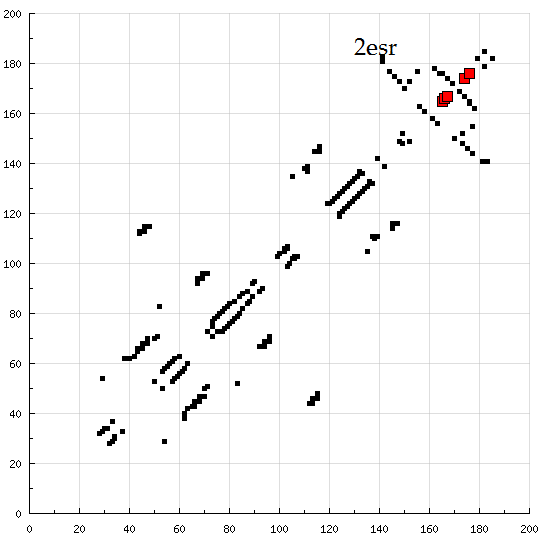 | | |
| **Fig. 2S.** Hb plots for the compounds 21A -protein complexes | | |


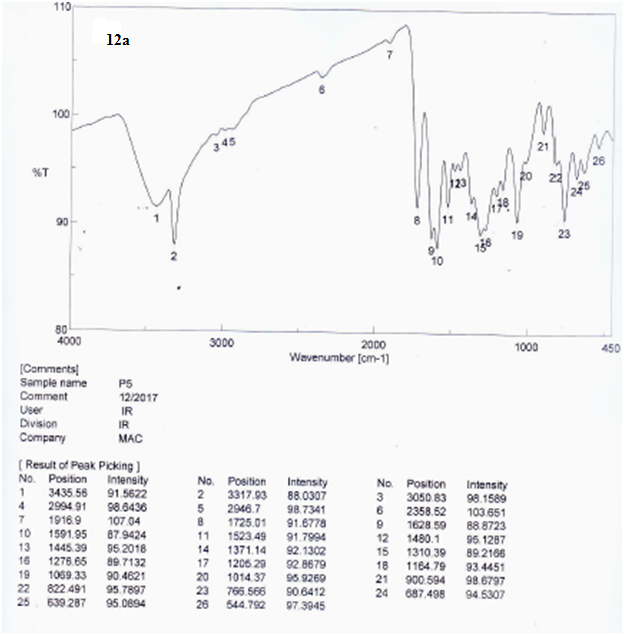


**Fig. 3S** IR spectrum of compound **12a**


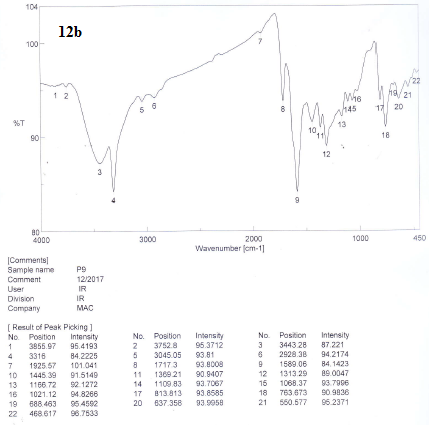


**Fig. 4S** IR spectrum of compound **12b**


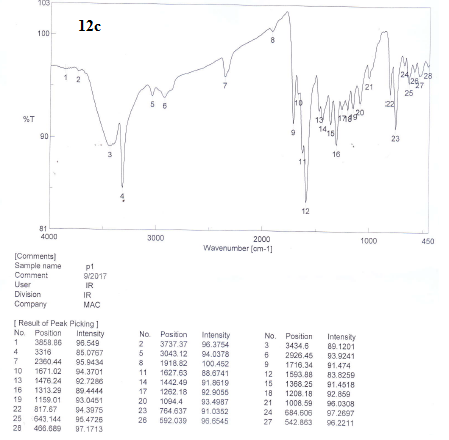


**Fig. 5S** IR spectrum of compound **12c**

**
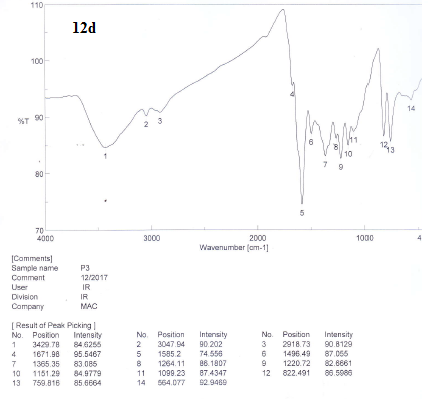
**

**Fig. 6S** IR spectrum of compound **12d**


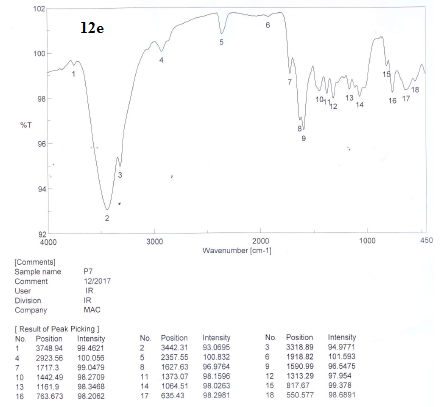


**Fig. 7S** IR spectrum of compound **12e**


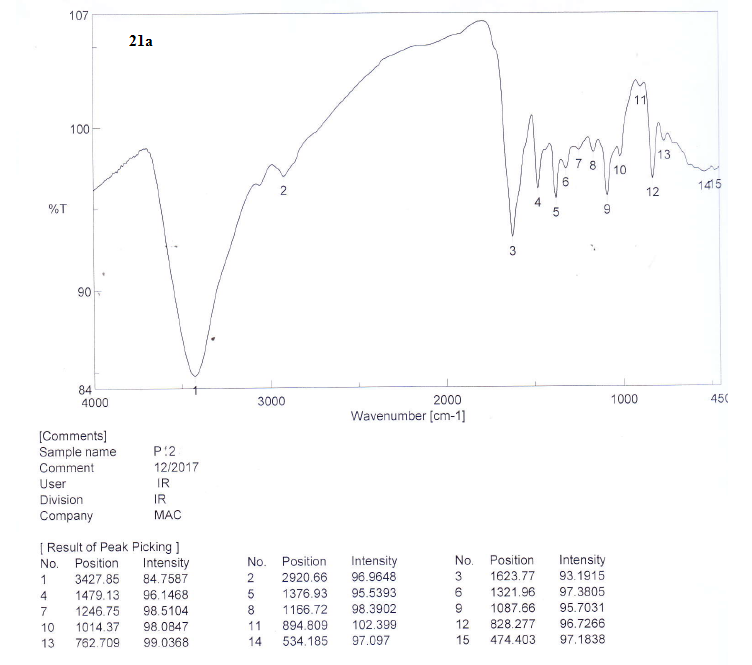


**Fig. 8S** IR spectrum of compound **21a**


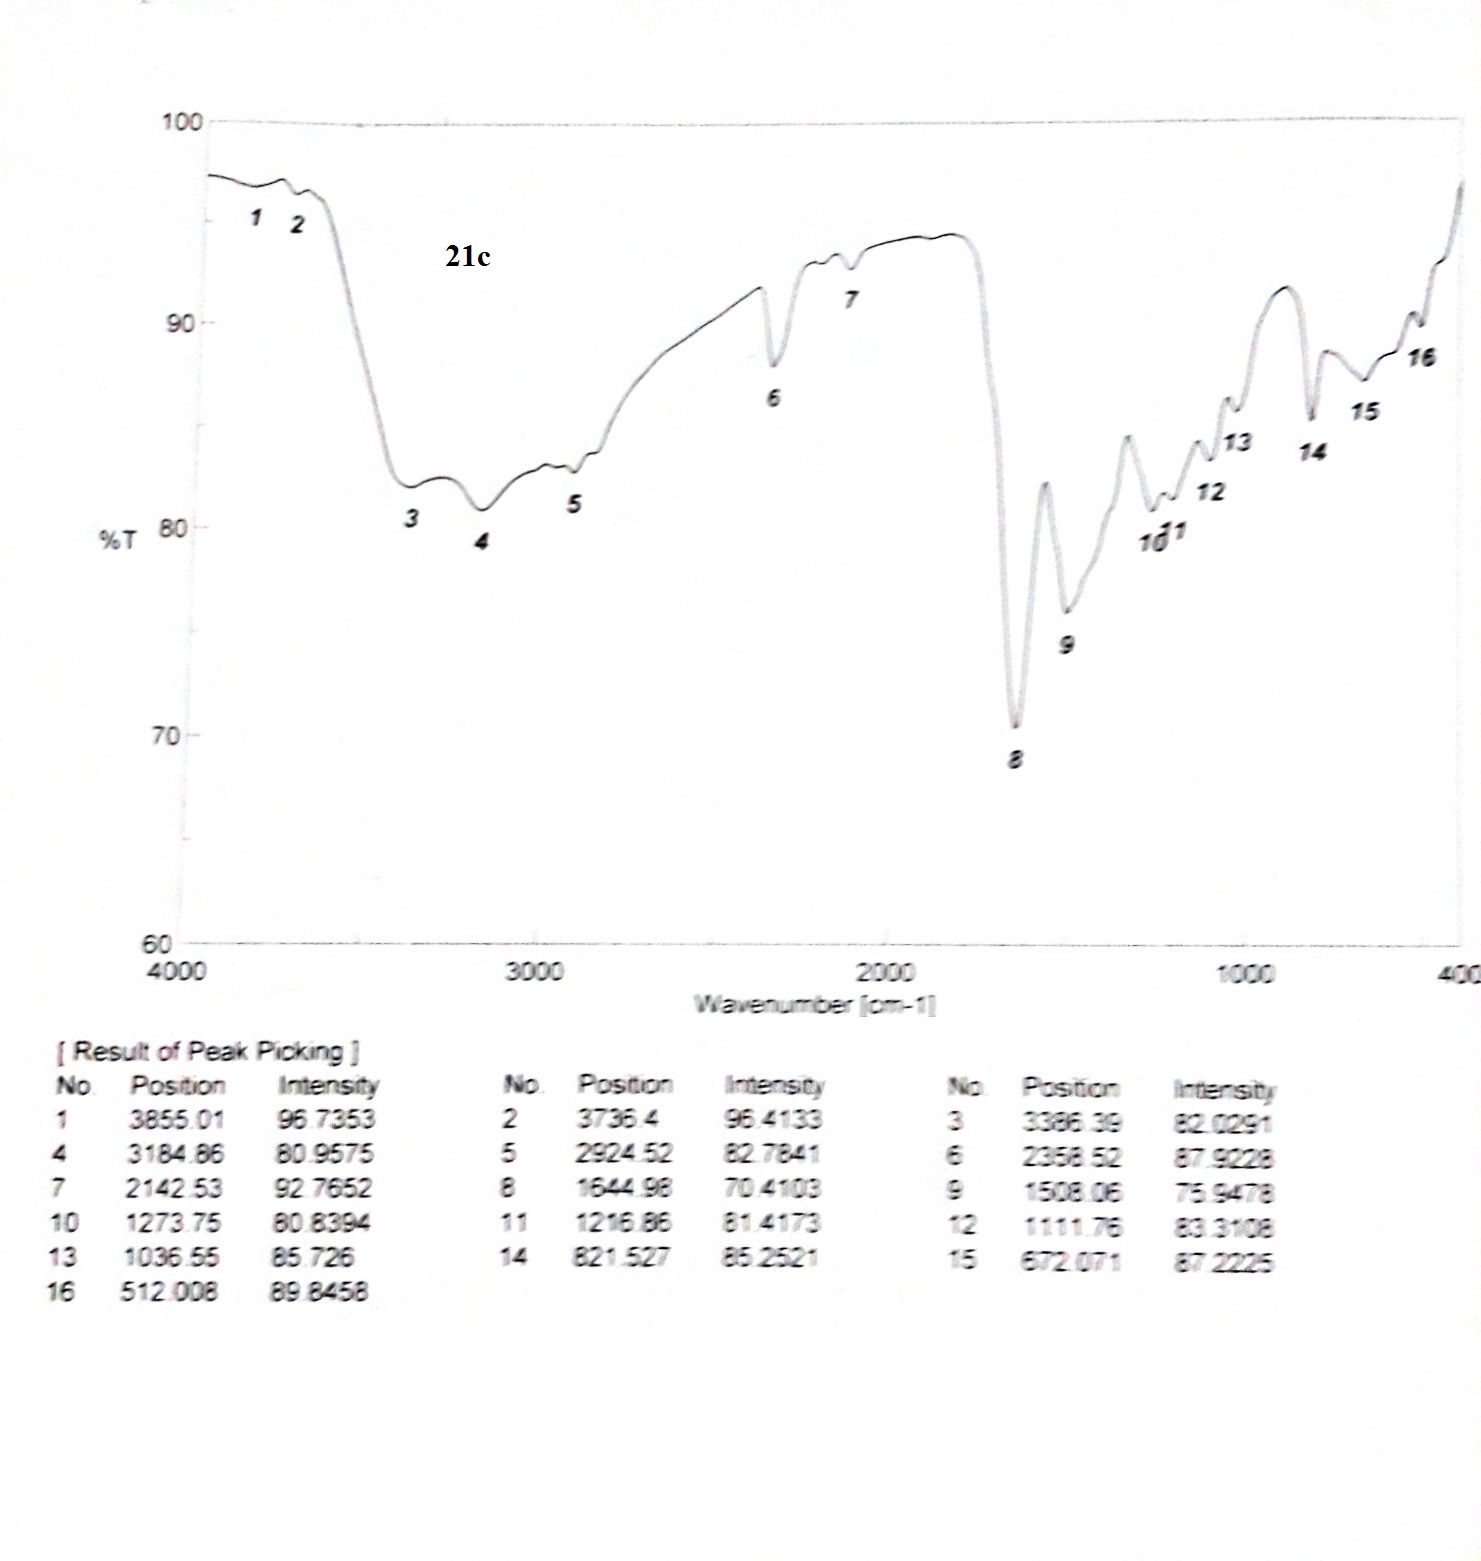


**Fig. 9S** IR spectrum of compound **21c**


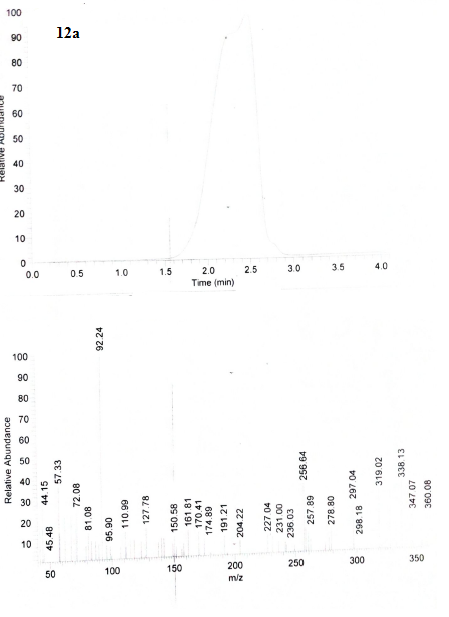


**Fig. 10S** Mass spectrum of compound **12a**

| 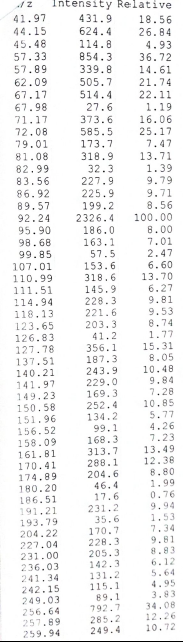 |  |
| --- | --- |

**Fig. 10S** Mass spectrum of compound **12a**


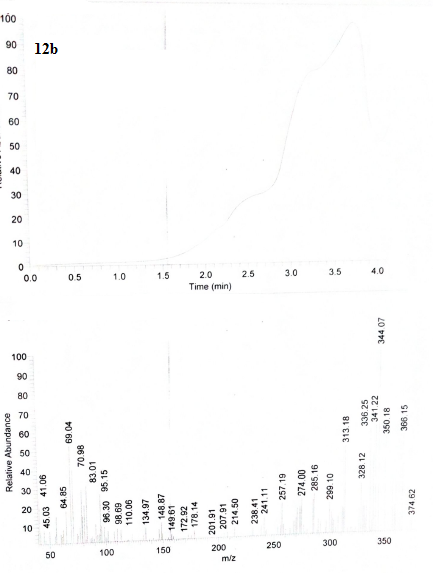


**Fig. 11S** Mass spectrum of compound **12b**

|  |  |  |
| --- | --- | --- |

**Fig. 11S** Mass spectrum of compound **12b**


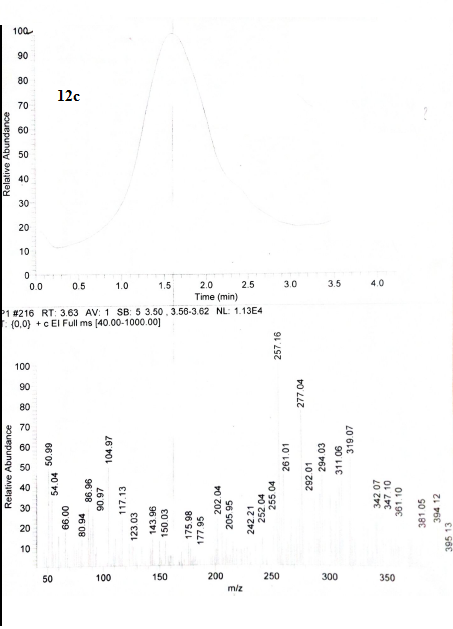


**Fig. 12S** Mass spectrum of compound **12c**


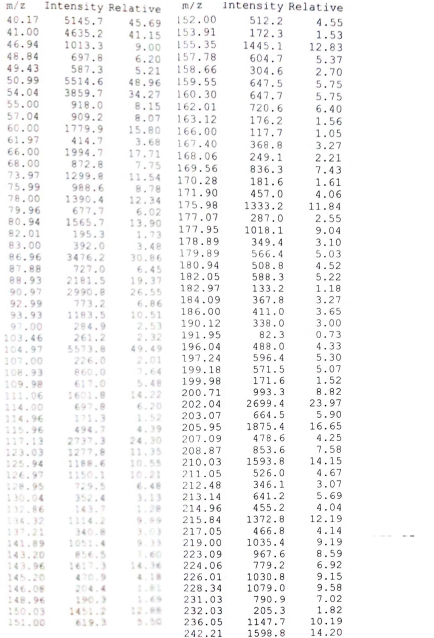


**Fig. 12S** Mass spectrum of compound **12c**


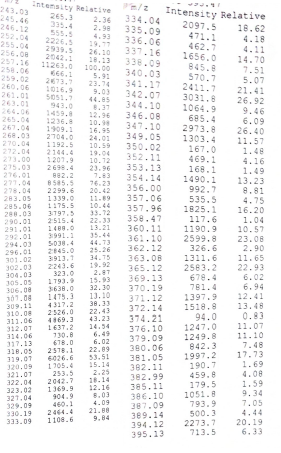


**Fig. 12S** Mass spectrum of compound **12c**


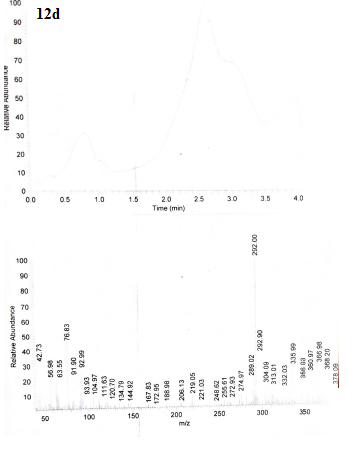


**Fig. 13S** Mass spectrum of compound **12d**

|  |  |  |
| --- | --- | --- |

**Fig. 13S** Mass spectrum of compound **12d**

**Fig. 13S** Mass spectrum of compound **12d**


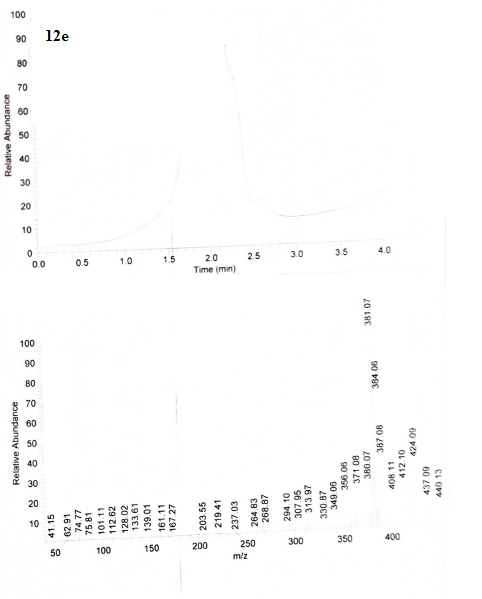


**Fig. 14S** Mass spectrum of compound **12e**

|  |  |
| --- | --- |


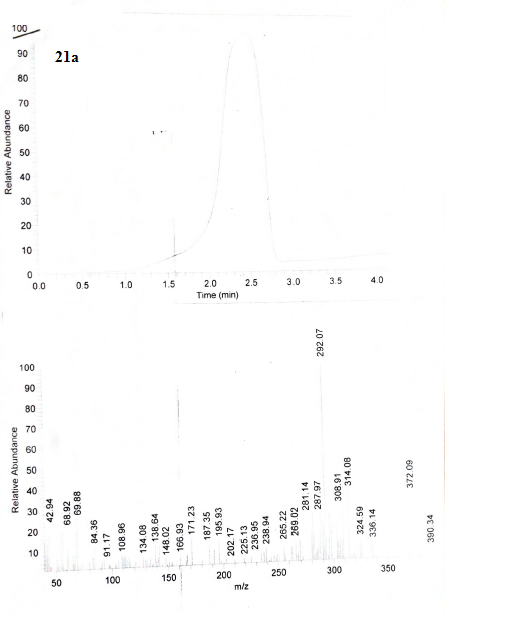


**Fig. 15S** Mass spectrum of compound **21a**

|  |  |  |
| --- | --- | --- |

**Fig. 15S** Mass spectrum of compound **21a**


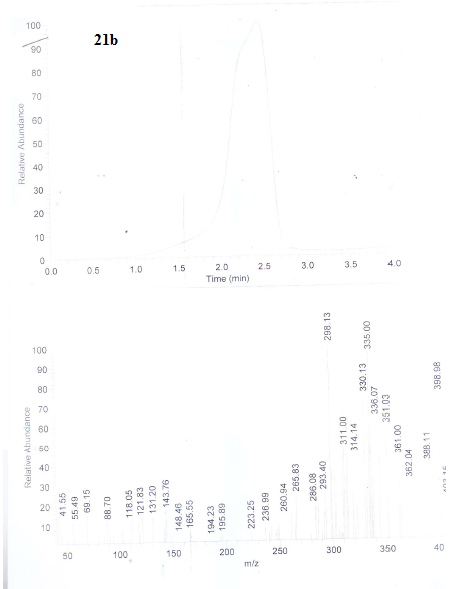


**Fig. 16S** Mass spectrum of compound **21b**

|  |  |
| --- | --- |

**Fig. 16S** Mass spectrum of compound **21b**


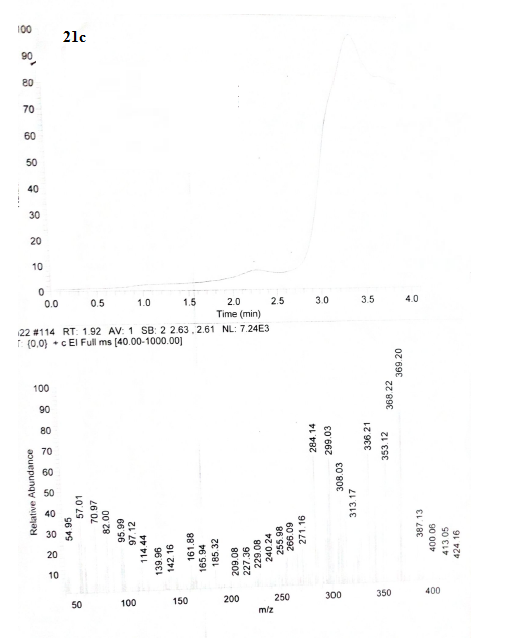


**Fig. 17S** Mass spectrum of compound **21c**

|  |  |  |
| --- | --- | --- |

**Fig. 17S** Mass spectrum of compound **21c**


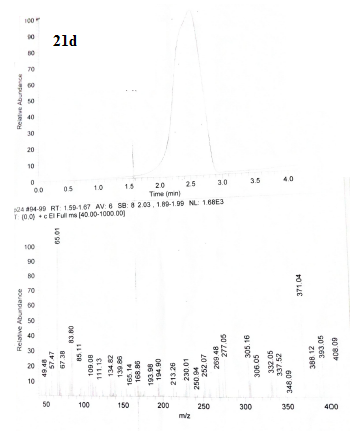


**Fig. 18S** Mass spectrum of compound **21d**


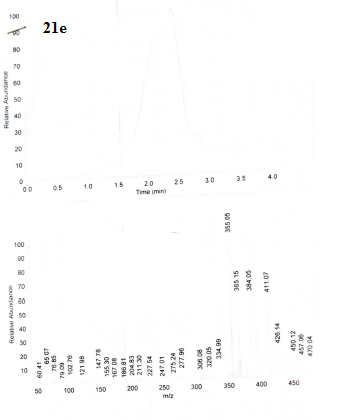


**Fig. 19S** Mass spectrum of compound **21e**


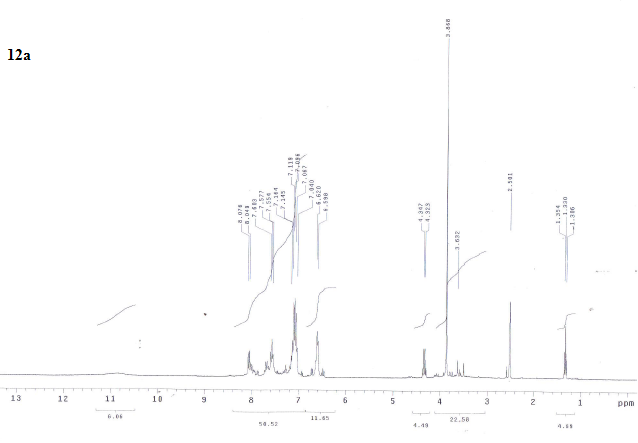


**Fig. 20S** 1H NMR spectrum for compound **12a**


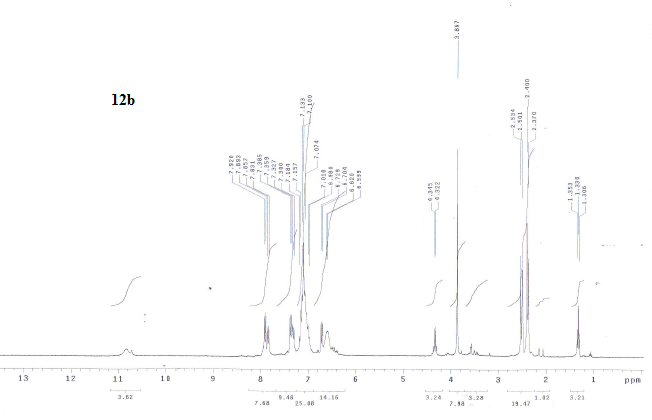


**Fig. 21S** 1H NMR spectrum for compound **12b**


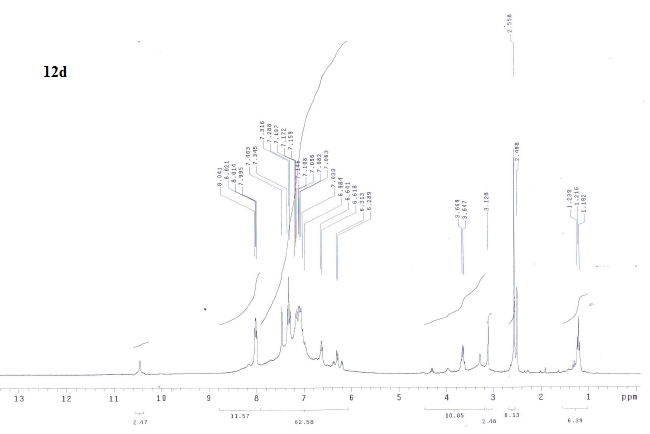


**Fig. 22S** 1H NMR spectrum for compound **12d**


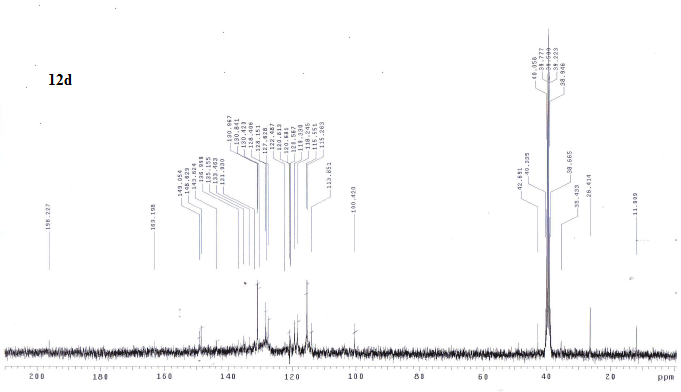


**Fig. 23S** 13C NMR spectrum for compound **12d**


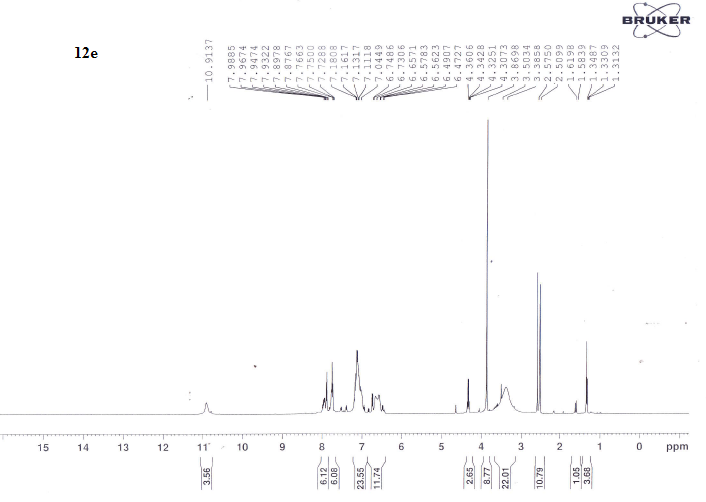


**Fig. 24S** 1H NMR spectrum for compound **12e**


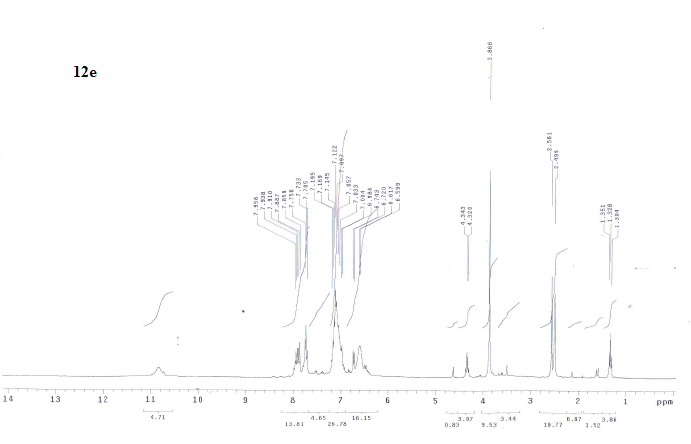


**Fig. 25S** 1H NMR spectrum for compound **12e**


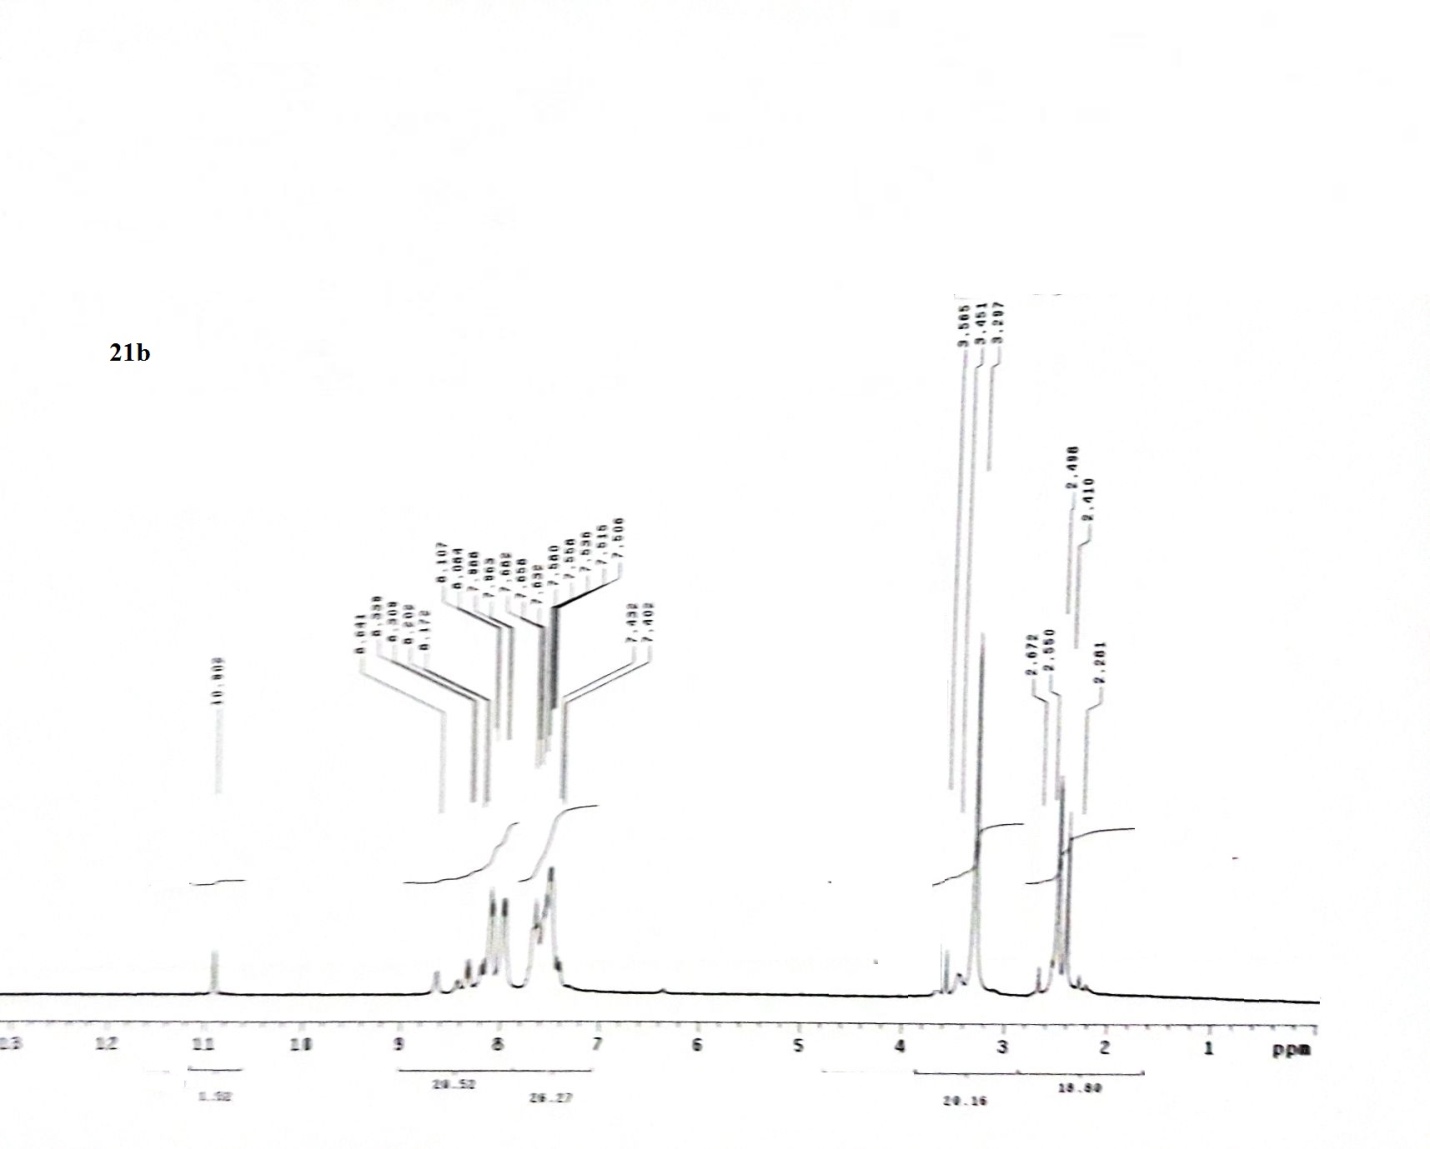


**Fig. 26S** 1H NMR spectrum for compound **21b**


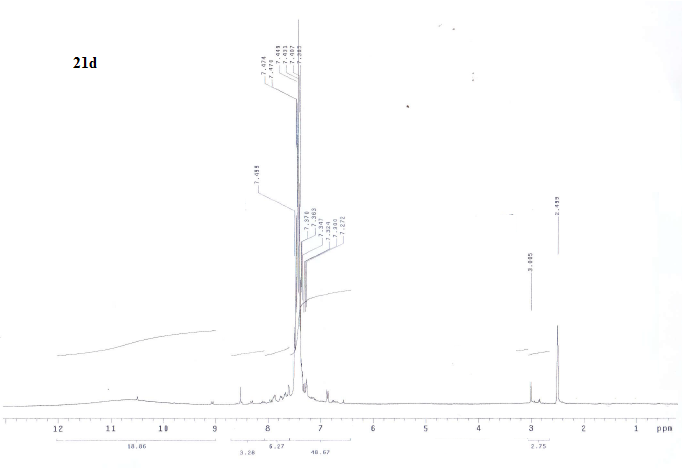


**Fig. 27S** 1H NMR spectrum for compound **21d**


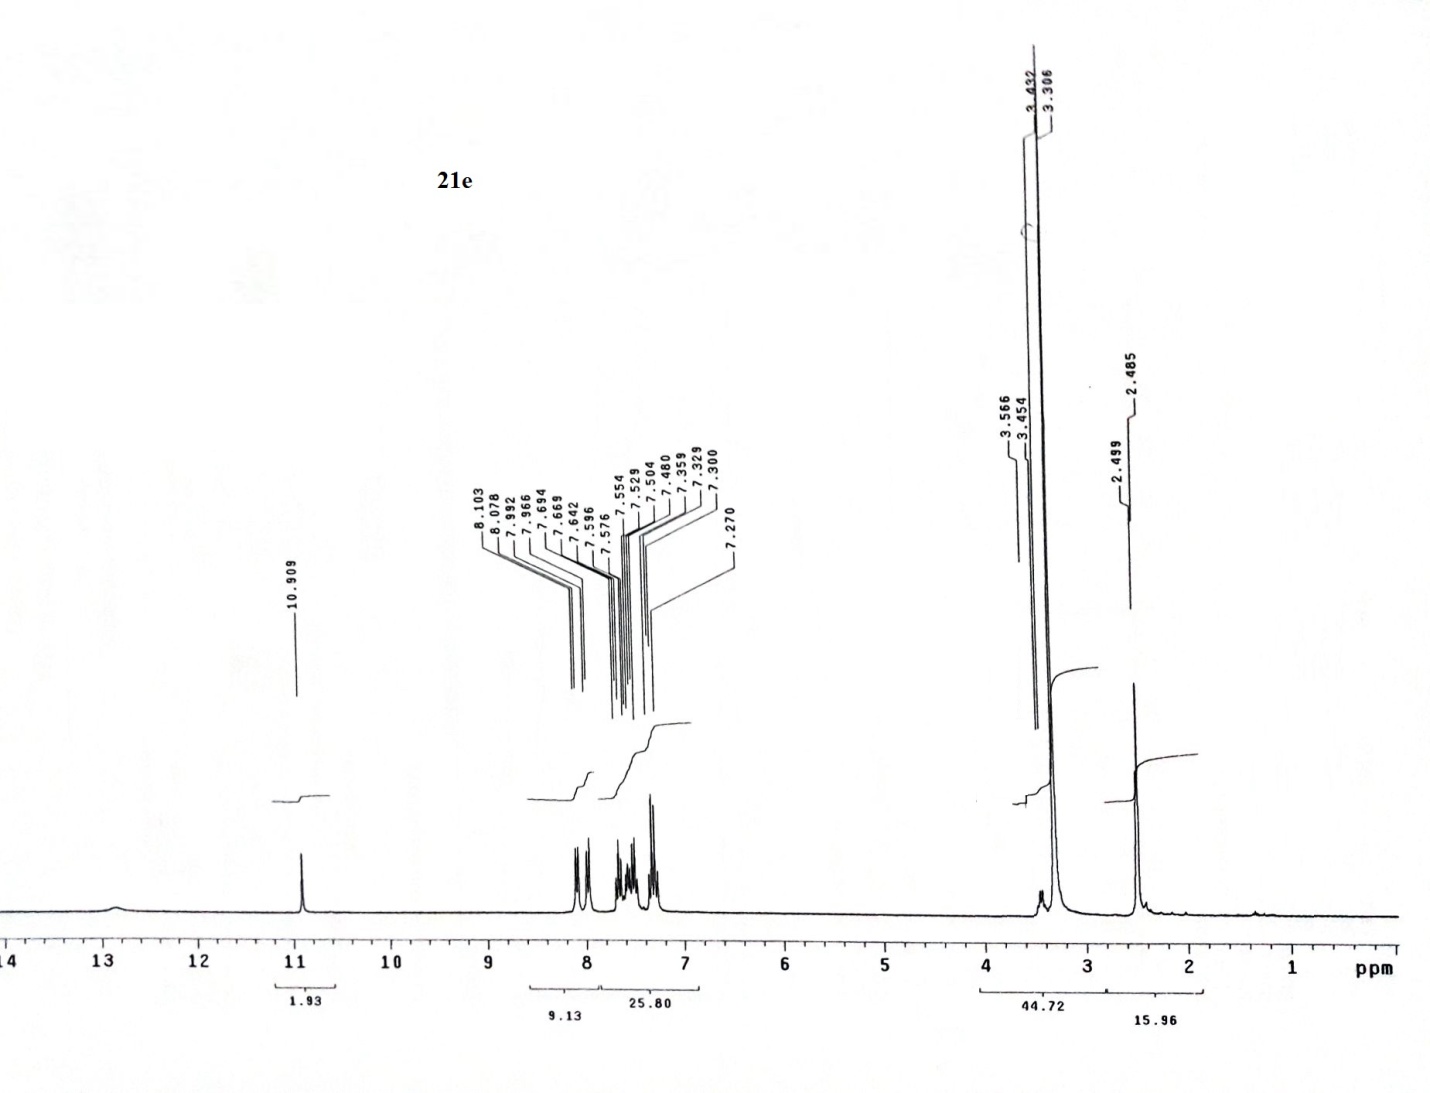


**Fig. 28S** 1H NMR spectrum for compound **21e**
